# Supplementary material for: Bioenergetic Profiling of the Differentiating Human MDS Myeloid Lineage with Low and High Bone Marrow Blast Counts
Source: PubMed Central journal article supplement (PMC7759906; doi:10.3390/cancers12123520), 2020-11-26
Supplement: cancers-12-03520-s001.pdf [file cancers-12-03520-s001.pdf]

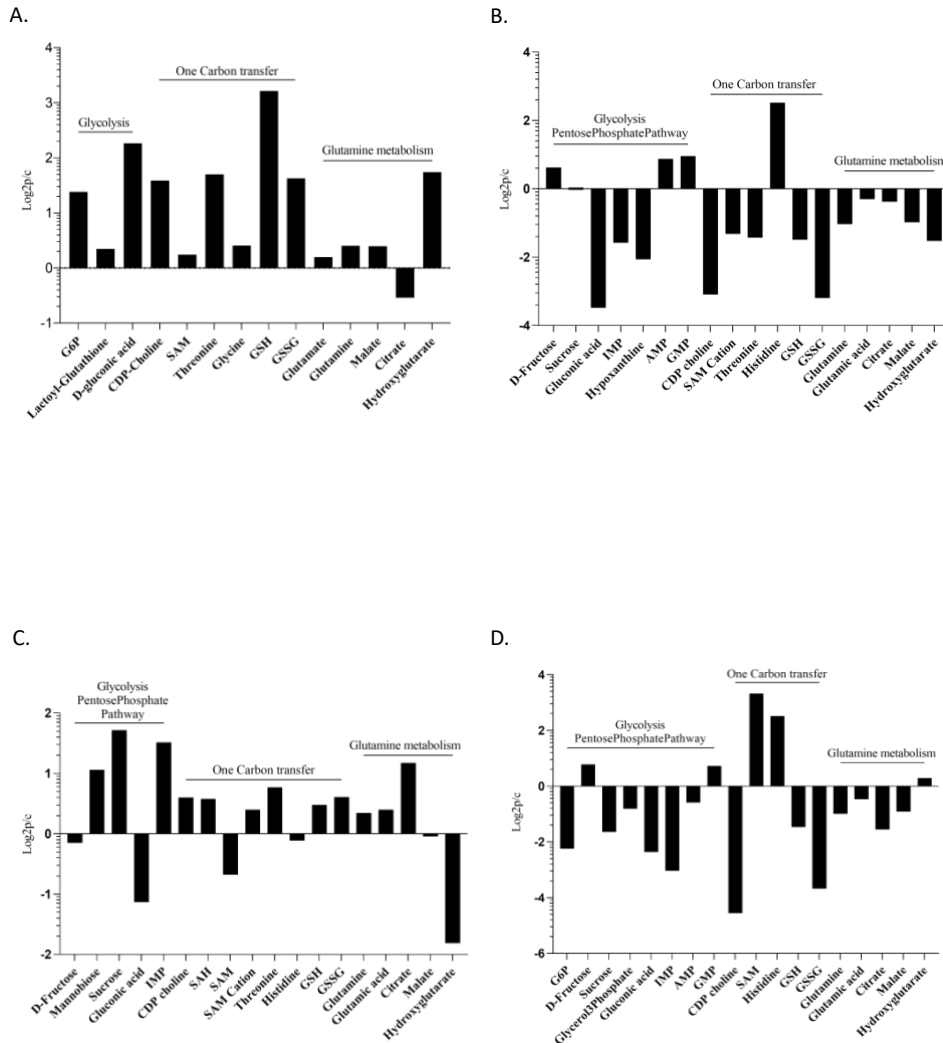

**Supplementary Figure 1. Key metabolic pathways in MDS profiling.** Modulation of metabolites per key metabolic pathway in (A) MDS myeloid cells compared to controls; (B) G2 vs. controls; (C) G1 vs. controls; (D) G1 vs. G2. Data represent log<sub>2</sub> fold change,  $p < 0.05$ . G6P: Glucose-6-Phosphate, CDP-choline: cytidine-diphospho-choline, SAM: S-adenosyl-methionine, GSH: Glutathione, GSSG: Glutathione disulfide. G1: Differentiating myeloid lineage cells isolated from MDS BM aspirates containing  $< 5\%$  blasts, G2: Differentiating myeloid lineage cells isolated from MDS BM aspirates containing  $\geq 5\%$  blasts.

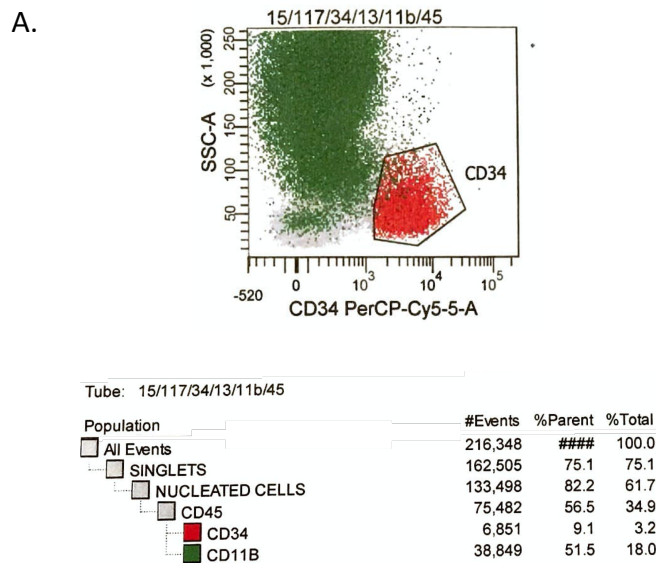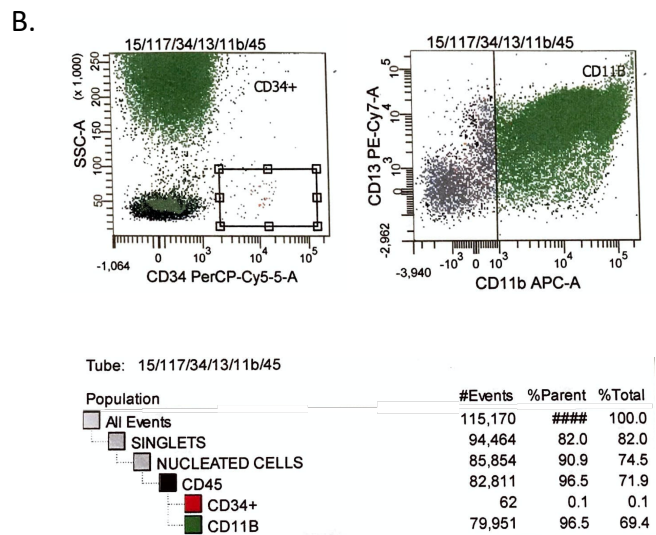

**Supplementary Figure 2: Control BM flow cytometry.** Flow cytometric analysis of (A) BM aspirate from a patient with MDS-EB2 (9% blasts) and (B) isolated high density layer of the same patient after ficoll bilayer isolation protocol. The flow cytometry acquisition was performed on a FACSCanto II flow cytometer. Flow cytometry analysis was performed using FlowJo software. A purity of >95% maturing myeloid lineage with 0.1% CD34+ contamination was established.

| Patient ID | Age (years) | Gender | MDS subtype      | IPSS-R             | Hb (g/dl) | WBC (K/ $\mu$ l) | Neutrophils (K/ $\mu$ l) | Platelets (K/ $\mu$ l) | BM Cytogenetics                                                         | Peripheral Blood Blasts (% of nucleated cells) <sup>†</sup> | BM Blasts (% of nucleated cells) <sup>††</sup> | BM cellularity* | Transfusion Dependence |
|------------|-------------|--------|------------------|--------------------|-----------|------------------|--------------------------|------------------------|-------------------------------------------------------------------------|-------------------------------------------------------------|------------------------------------------------|-----------------|------------------------|
| 1          | 81          | Female | MLD              | 1 (very low)       | 11,3      | 4,74             | 2,70                     | 139                    | 46,XX[20]                                                               | 0                                                           | 2                                              | Normocellular   | No                     |
| 2          | 83          | Male   | MLD              | 1 (very low)       | 13,0      | 3,53             | 1,90                     | 142                    | 46,XY[20]                                                               | 0                                                           | 2                                              | Hypocellular    | No                     |
| 3          | 78          | Male   | MLD              | 2,5 (low)          | 6,6       | 3,25             | 1,25                     | 116                    | 46,XY[20]                                                               | 0                                                           | 3                                              | Hypocellular    | Yes                    |
| 4          | 74          | Female | Isolated del(5q) | 2 (low)            | 8,5       | 2,77             | 1,67                     | 386                    | 46,XX,del(5q)[20]                                                       | 0                                                           | 1                                              | Normocellular   |                        |
| 5          | 82          | Female | MLD              | 1 (very low)       | 10,6      | 4,50             | 3,15                     | 177                    | 46,XX[20]                                                               | 0                                                           | 2                                              | Normocellular   | No                     |
| 6          | 77          | Male   | MLD              | 1 (very low)       | 9,3       | 4,90             | 2,74                     | 324                    | 46,X,-Y[20]                                                             | 2                                                           | 3                                              | Normocellular   | Yes                    |
| 7          | 80          | Male   | SLD              | 3 (low)            | 8,8       | 8,18             | 5,64                     | 520                    | 46,XY[20]                                                               | 0                                                           | 0                                              | Hypercellular   | Yes                    |
| 8          | 78          | Male   | MLD              | 3 (low)            | 9,5       | 2,38             | 1,67                     | 148                    | 46,XY[20]                                                               | 0                                                           | 4                                              | Normocellular   | Yes                    |
| 9          | 77          | Male   | EB 1             | 6 (high)           | 9,4       | 1,83             | 0,60                     | 56                     | 46,XY, del(5)(q11.2q33), del(20)(q11.2-13.1)[18]/46,XY[1]               | 1                                                           | 8                                              | Normocellular   |                        |
| 10         | 85          | Male   | MLD              | 3,5 (intermediate) | 5,6       | 3,48             | 2,50                     | 131                    | 47,XY,+8[20]/46,XY[5]                                                   | 0                                                           | 0                                              | Normocellular   | Yes                    |
| 11         | 63          | Male   | MLD              | 2 (low)            | 10,7      | 3,16             | 0,90                     | 274                    | 46,XY, inv(9)(p12q13)[12]                                               | 0                                                           | 0                                              | Hypocellular    | No                     |
| 12         | 79          | Female | EB 2             | 6 (high)           | 9,0       | 4,47             | 2,00                     | 103                    | 47,XX,+8[20]                                                            | 5                                                           | 15                                             | Hypercellular   | No                     |
| 13         | 90          | Male   | EB 1             | 7,5 (very high)    | 4,7       | 9,32             | 6,90                     | 184                    | 46,XY, del(7)(q21)[6]/45,XY?add(1)(p36),add(2)(q37),del(7)(q21),-20[15] | 2                                                           | 8                                              | Normocellular   | Yes                    |
| 14         | 75          | Male   | EB 2             | 7 (very high)      | 8,6       | 1,90             | 0,50                     | 58                     | 47,XY,+8[23]/46,XY[2]                                                   | 3                                                           | 15                                             | Hypercellular   | Yes                    |
| 15         | 81          | Male   | MLD              | 3(low)             | 8,0       | 1,78             | 0,50                     | 145                    | 47,XY,+8[23]/46,XY[2]                                                   | 0                                                           | 0                                              | Hypercellular   | No                     |
| 16         | 81          | Male   | MLD              | 2(low)             | 8,9       | 2,11             | 1,0                      | 120                    | 46,XY, del(20)(q11.2)[30]                                               | 0                                                           | 1                                              | Hypercellular   | No                     |

**Supplemental Table 1. MDS Patients characteristics.**

Hb: hemoglobin, WBC: white blood cells † assessed by morphology in peripheral blood smears, †† assessed by morphology of bone marrow smears, \*assessed in bone marrow biopsy

| Lipids with VIP score greater than or equal to 1 |         |             |            |                  |          |
|--------------------------------------------------|---------|-------------|------------|------------------|----------|
| ID                                               | VIP     | FORMULA     | COEF       | FOLD CHANGE (FC) | log2(FC) |
| 369                                              | 1.67299 | C42H84NO7P  | -0.0464661 | 0.3521           | -1.506   |
| 179                                              | 1.59156 | C20H30O5    | -0.0193666 | 0.19355          | -2.3692  |
| 384                                              | 1.57968 | C45H82NO7P  | -0.0460789 | 0.44171          | -1.1788  |
| 454                                              | 1.57418 | C47H83O13P  | -0.0181425 | 0.58358          | -0.77699 |
| 382                                              | 1.56125 | C45H80NO7P  | -0.0348027 | 0.3613           | -1.4687  |
| 274                                              | 1.51046 | C34H34N4O4  | -0.0139848 | 0.1757           | -2.5088  |
| 376                                              | 1.44003 | C44H86NO7P  | -0.0416105 | NA               | NA       |
| 169                                              | 1.43633 | C22H43NO    | -0.0148299 | 0.13294          | -2.9112  |
| 449                                              | 1.39729 | C46H76NO10P | -0.0113553 | NA               | NA       |
| 380                                              | 1.35439 | C45H78NO7P  | 0.0381154  | 22.265           | 4.4767   |
| 305                                              | 1.34174 | C37H75N2O6P | -0.0229592 | 0.66298          | -0.59296 |
| 453                                              | 1.29929 | C46H87NO13  | -0.0314464 | 0.66578          | -0.58689 |
| 326                                              | 1.24561 | C39H80N2O6P | 0.0224264  | 14.437           | 3.8517   |
| 327                                              | 1.23729 | C41H76NO7P  | -0.0332823 | NA               | NA       |
| 393                                              | 1.23415 | C44H84NO8P  | 0.0357335  | 1.2376           | 0.30759  |
| 349                                              | 1.22073 | C42H84NO7P  | 0.0040528  | 0.48929          | -1.0312  |
| 183                                              | 1.20844 | C21H40O4    | -0.0008714 | 0.59655          | -0.74528 |
| 383                                              | 1.20777 | C42H80NO8P  | -0.0117198 | 0.30917          | -1.6935  |
| 423                                              | 1.19005 | C46H84NO8P  | -0.0183378 | 0.39158          | -1.3526  |
| 389                                              | 1.1852  | C42H84NO8P  | -0.000982  | 0.49609          | -1.0113  |
| 359                                              | 1.17911 | C42H82NO8P  | -0.0087269 | 0.56196          | -0.83147 |
| 251                                              | 1.14855 | C26H56NO6P  | -0.0181191 | NA               | NA       |
| 203                                              | 1.11676 | C24H38O4    | -0.0028356 | 1.883            | 0.91304  |
| 370                                              | 1.11313 | C44H82NO7P  | -0.0207497 | 0.23794          | -2.0713  |
| 357                                              | 1.09539 | C42H80NO8P  | 0.0101928  | 0.76901          | -0.37892 |
| 304                                              | 1.07597 | C37H73N2O6P | -0.0163743 | 0.4492           | -1.1546  |
| 208                                              | 1.06166 | C23H45NO4   | -0.0075633 | 0.48287          | -1.0503  |
| 333                                              | 1.05824 | C40H78NO8P  | -0.008696  | 0.59894          | -0.73952 |
| 248                                              | 1.05197 | C26H54NO6P  | -0.012436  | 0.65592          | -0.60841 |
| 350                                              | 1.04853 | C43H74NO7P  | 0.0178384  | 1.3289           | 0.41024  |
| 437                                              | 1.04825 | C48H84NO7P  | 0.0244126  | NA               | NA       |
| 379                                              | 1.03833 | C42H79O10P  | 0.0175388  | 4.4189           | 2.1437   |
| 272                                              | 1.02962 | C26H54NO7P  | 0.0150358  | 7.5182           | 2.9104   |
| 197                                              | 1.02332 | C18H38NO5P  | 0.00939553 | 4.0026           | 2.0009   |
| 317                                              | 1.0227  | C39H79N2O6P | 0.0122224  | 1.9648           | 0.97437  |
| 137                                              | 1.00846 | C18H37NO2   | -0.0024647 | 0.64887          | -0.624   |

**Supplemental Table 2. MDS myeloid cell metabolome compared to that of non-MDS (control group). LC-MS analysis in negative ion mode**

| Lipids with VIP score greater than or equal to 1 |         |             |            |                  |          |
|--------------------------------------------------|---------|-------------|------------|------------------|----------|
| ID                                               | VIP     | FORMULA     | COEF       | FOLD CHANGE (FC) | log2(FC) |
| 369                                              | 1.67299 | C42H84NO7P  | -0.0464661 | 0.3521           | -1.506   |
| 179                                              | 1.59156 | C20H30O5    | -0.0193666 | 0.19355          | -2.3692  |
| 384                                              | 1.57968 | C45H82NO7P  | -0.0460789 | 0.44171          | -1.1788  |
| 454                                              | 1.57418 | C47H83O13P  | -0.0181425 | 0.58358          | -0.77699 |
| 382                                              | 1.56125 | C45H80NO7P  | -0.0348027 | 0.3613           | -1.4687  |
| 274                                              | 1.51046 | C34H34N4O4  | -0.0139848 | 0.1757           | -2.5088  |
| 376                                              | 1.44003 | C44H86NO7P  | -0.0416105 | NA               | NA       |
| 169                                              | 1.43633 | C22H43NO    | -0.0148299 | 0.13294          | -2.9112  |
| 449                                              | 1.39729 | C46H76NO10P | -0.0113553 | NA               | NA       |
| 380                                              | 1.35439 | C45H78NO7P  | 0.0381154  | 22.265           | 4.4767   |
| 305                                              | 1.34174 | C37H75N2O6P | -0.0229592 | 0.66298          | -0.59296 |
| 453                                              | 1.29929 | C46H87NO13  | -0.0314464 | 0.66578          | -0.58689 |
| 326                                              | 1.24561 | C39H80N2O6P | 0.0224264  | 14.437           | 3.8517   |
| 327                                              | 1.23729 | C41H76NO7P  | -0.0332823 | NA               | NA       |
| 393                                              | 1.23415 | C44H84NO8P  | 0.0357335  | 1.2376           | 0.30759  |
| 349                                              | 1.22073 | C42H84NO7P  | 0.0040528  | 0.48929          | -1.0312  |
| 183                                              | 1.20844 | C21H40O4    | -0.0008714 | 0.59655          | -0.74528 |
| 383                                              | 1.20777 | C42H80NO8P  | -0.0117198 | 0.30917          | -1.6935  |
| 423                                              | 1.19005 | C46H84NO8P  | -0.0183378 | 0.39158          | -1.3526  |
| 389                                              | 1.1852  | C42H84NO8P  | -0.000982  | 0.49609          | -1.0113  |
| 359                                              | 1.17911 | C42H82NO8P  | -0.0087269 | 0.56196          | -0.83147 |
| 251                                              | 1.14855 | C26H56NO6P  | -0.0181191 | NA               | NA       |
| 203                                              | 1.11676 | C24H38O4    | -0.0028356 | 1.883            | 0.91304  |
| 370                                              | 1.11313 | C44H82NO7P  | -0.0207497 | 0.23794          | -2.0713  |
| 357                                              | 1.09539 | C42H80NO8P  | 0.0101928  | 0.76901          | -0.37892 |
| 304                                              | 1.07597 | C37H73N2O6P | -0.0163743 | 0.4492           | -1.1546  |
| 208                                              | 1.06166 | C23H45NO4   | -0.0075633 | 0.48287          | -1.0503  |
| 333                                              | 1.05824 | C40H78NO8P  | -0.008696  | 0.59894          | -0.73952 |
| 248                                              | 1.05197 | C26H54NO6P  | -0.012436  | 0.65592          | -0.60841 |
| 350                                              | 1.04853 | C43H74NO7P  | 0.0178384  | 1.3289           | 0.41024  |
| 437                                              | 1.04825 | C48H84NO7P  | 0.0244126  | NA               | NA       |
| 379                                              | 1.03833 | C42H79O10P  | 0.0175388  | 4.4189           | 2.1437   |
| 272                                              | 1.02962 | C26H54NO7P  | 0.0150358  | 7.5182           | 2.9104   |
| 197                                              | 1.02332 | C18H38NO5P  | 0.00939553 | 4.0026           | 2.0009   |
| 317                                              | 1.0227  | C39H79N2O6P | 0.0122224  | 1.9648           | 0.97437  |
| 137                                              | 1.00846 | C18H37NO2   | -0.0024647 | 0.64887          | -0.624   |

**Supplemental Table 3. MDS myeloid cell metabolome compared to that of non-MDS (control group). LC-MS analysis in positive ion mode**

| Lipids with VIP score greater than or equal to 1 |         |             |            |                  |          |
|--------------------------------------------------|---------|-------------|------------|------------------|----------|
| ID                                               | VIP     | FORMULA     | COEF       | FOLD CHANGE (FC) | log2(FC) |
| 303                                              | 1.77137 | C43H74NO7P  | -0.0749743 | 9.8149           | 3.295    |
| 282                                              | 1.76826 | C41H80NO7P  | -0.0865403 | 3.5157           | 1.8138   |
| 323                                              | 1.58163 | C43H78NO8P  | 0.0517995  | 0.20387          | -2.2943  |
| 126                                              | 1.46362 | C20H38O2    | -0.0242533 | 19.455           | 4.2821   |
| 392                                              | 1.38602 | C46H80NO10P | 0.0245433  | 0.05835          | -4.0991  |
| 306                                              | 1.37012 | C43H76NO7P  | -0.0484352 | 1.7628           | 0.81791  |
| 408                                              | 1.30578 | C45H85O13P  | -0.0121136 | 8.2019           | 3.036    |
| 232                                              | 1.28481 | C27H53O12P  | -0.037725  | 2.5861           | 1.3708   |
| 262                                              | 1.28455 | C39H76NO7P  | -0.0495741 | 2.0221           | 1.0158   |
| 393                                              | 1.27746 | C46H82NO10P | 0.0130141  | 0.16864          | -2.568   |
| 251                                              | 1.25278 | C37H69O8P   | 0.0144587  | 0.1335           | -2.9051  |
| 342                                              | 1.2475  | C45H82NO7P  | 0.0149183  | 0.35362          | -1.4997  |
| 410                                              | 1.24601 | C45H83O13P  | -0.0221597 | 3.6458           | 1.8662   |
| 266                                              | 1.1723  | C39H76NO8P  | 0.0102356  | 0.40989          | -1.2867  |
| 407                                              | 1.15208 | C45H83O13P  | -0.0042759 | 2.7955           | 1.4831   |
| 374                                              | 1.14308 | C44H76NO10P | 0.00203827 | 0.29466          | -1.7629  |
| 376                                              | 1.11657 | C44H78NO10P | 0.00870088 | 0.37545          | -1.4133  |
| 287                                              | 1.09655 | C41H74NO8P  | -0.0035131 | 0.37527          | -1.414   |
| 231                                              | 1.08329 | C27H51O12P  | -0.0121638 | 2.5861           | 1.3708   |
| 264                                              | 1.06395 | C39H74NO8P  | 0.0137117  | 0.40031          | -1.3208  |
| 308                                              | 1.0311  | C43H78NO7P  | -0.0273842 | 0.63197          | -0.66207 |
| 142                                              | 1.02439 | C22H36O2    | -0.0256213 | 2.3473           | 1.231    |

**Supplemental Table 4. G2 metabolome compared to that of non-MDS (control group).  
LC-MS analysis in negative ion mode**

| Lipids with VIP score greater than or equal to 1 |          |             |            |                  |           |
|--------------------------------------------------|----------|-------------|------------|------------------|-----------|
| ID                                               | VIP      | FORMULA     | COEF       | FOLD CHANGE (FC) | log2(FC)  |
| 454                                              | 1.6029   | C47H83O13P  | -0.0506303 | 2.4627           | 1.3002    |
| 453                                              | 1.60134  | C46H87NO13  | -0.0549459 | 3.9139           | 1.9686    |
| 183                                              | 1.59573  | C21H40O4    | -0.0349459 | 42.126           | 5.3966    |
| 369                                              | 1.59105  | C42H84NO7P  | -0.0603147 | 110.29           | 6.7852    |
| 403                                              | 1.40332  | C42H80NO10P | -0.0503103 | 3.1293           | 1.6458    |
| 390                                              | 1.39647  | C44H82NO8P  | -0.0499924 | 19.495           | 4.2851    |
| 423                                              | 1.38073  | C46H84NO8P  | -0.0352844 | 141.17           | 7.1413    |
| 382                                              | 1.37022  | C45H80NO7P  | -0.0535288 | 5.3179           | 2.4109    |
| 389                                              | 1.32988  | C42H84NO8P  | -0.0252421 | 5.9296           | 2.5679    |
| 330                                              | 1.30496  | C41H81N2O6P | 0.0173829  | 0.14109          | -2.8253   |
| 317                                              | 1.30309  | C39H79N2O6P | 0.0192753  | 0.24687          | -2.0182   |
| 418                                              | 1.28128  | C42H78NO10P | -0.0268764 | 31.923           | 4.9965    |
| 325                                              | 1.248    | C41H74NO7P  | -0.0385346 | 2.8752           | 1.5237    |
| 394                                              | 1.21938  | C44H84NO8P  | -0.0370931 | 1803.2           | 10.816    |
| 5                                                | 1.13297  | C2H7NO3S    | -0.0294512 | 2.4339           | 1.2833    |
| 328                                              | 1.10154  | C41H78NO7P  | -0.0407644 | 4.6973           | 2.2318    |
| 393                                              | 1.09702  | C44H84NO8P  | 0.0410293  | 0.93314          | -0.099836 |
| 424                                              | 1.03125  | C47H91N2O6P | 0.00215556 | 0.42135          | -1.2469   |
| 348                                              | 1.02143  | C41H80NO8P  | -0.0362665 | 1.791            | 0.84075   |
| 442                                              | 1.0068   | C44H78NO10P | 0.0100563  | 0.37715          | -1.4068   |
| 261                                              | 0.994222 | C26H54NO7P  | 0.0209805  | 0.27089          | -1.8842   |

**Supplemental Table 5. G2 metabolome compared to that of non-MDS (control group).  
LC-MS analysis in positive ion mode**

| Lipids with VIP score greater than or equal to 1 |         |             |            |                  |          |
|--------------------------------------------------|---------|-------------|------------|------------------|----------|
| ID                                               | VIP     | FORMULA     | COEF       | FOLD CHANGE (FC) | log2(FC) |
| 332                                              | 1.66515 | C42H79O11P  | 0.0777219  | 0.46266          | -1.112   |
| 324                                              | 1.49286 | C43H78NO8P  | -0.0860096 | 2.6369           | 1.3988   |
| 307                                              | 1.38128 | C43H78NO7P  | -0.0740215 | 3.6469           | 1.8667   |
| 196                                              | 1.3537  | C23H46NO7P  | -0.0732541 | 1.7247           | 0.78637  |
| 277                                              | 1.33043 | C41H78NO7P  | 0.0634909  | 0.57371          | -0.8016  |
| 212                                              | 1.3139  | C24H46NO9P  | -0.0316119 | 3.9641           | 1.987    |
| 302                                              | 1.29242 | C40H75O10P  | 0.0565096  | 0.26904          | -1.8941  |
| 138                                              | 1.22993 | C18H30O3S   | 0.0666913  | 0.67926          | -0.55797 |
| 353                                              | 1.2288  | C42H78NO10P | -0.0506572 | 1.6782           | 0.74695  |
| 215                                              | 1.21639 | C24H48NO9P  | -0.0380766 | 1.8066           | 0.85325  |
| 244                                              | 1.18487 | C35H69O8P   | -0.0534653 | 2.9863           | 1.5784   |
| 410                                              | 1.16166 | C45H83O13P  | -0.0371914 | 2.3441           | 1.229    |
| 210                                              | 1.15229 | C24H47O9P   | 0.031616   | 1.1559           | 0.20903  |
| 231                                              | 1.10048 | C27H51O12P  | 0.00879756 | 1.6188           | 0.6949   |
| 232                                              | 1.09376 | C27H53O12P  | -0.0278768 | 1.5541           | 0.63607  |
| 240                                              | 1.09038 | C29H49O12P  | -0.0304224 | 1.7502           | 0.80756  |
| 323                                              | 1.0476  | C43H78NO8P  | 0.0318223  | 0.72716          | -0.45966 |
| 351                                              | 1.04651 | C42H76NO10P | 0.0364566  | 0.46096          | -1.1173  |
| 262                                              | 1.03788 | C39H76NO7P  | -0.0542978 | 1.478            | 0.5636   |
| 306                                              | 1.03455 | C43H76NO7P  | -0.0486245 | 1.6958           | 0.76198  |
| 304                                              | 1.0257  | C40H77O10P  | 0.0249812  | 1.0893           | 0.12345  |

**Supplemental Table 6. G1 metabolome compared to that of non-MDS (control group)  
LC-MS analysis in negative ion mode**



| Lipids with VIP score greater than or equal to 1 |         |             |            |                  |          |
|--------------------------------------------------|---------|-------------|------------|------------------|----------|
| ID                                               | VIP     | FORMULA     | COEF       | FOLD CHANGE (FC) | log2(FC) |
| 317                                              | 1.60246 | C39H79N2O6P | 0.0586366  | 0.88465          | -0.17683 |
| 143                                              | 1.53241 | C20H32O2    | 0.0796232  | 0.51792          | -0.94919 |
| 350                                              | 1.3839  | C43H74NO7P  | 0.0439179  | 0.61715          | -0.69632 |
| 369                                              | 1.36118 | C42H84NO7P  | -0.0707108 | 2.0419           | 1.0299   |
| 325                                              | 1.31432 | C41H74NO7P  | 0.0266586  | 0.80537          | -0.31228 |
| 402                                              | 1.22401 | C42H80NO10P | 0.0421728  | 0.85839          | -0.22029 |
| 256                                              | 1.22038 | C26H50NO7P  | 0.0310498  | 1.0749           | 0.10421  |
| 393                                              | 1.19593 | C44H84NO8P  | 0.0567897  | 0.76683          | -0.38302 |
| 397                                              | 1.13169 | C42H78NO10P | -0.0454384 | 1.7492           | 0.80668  |
| 305                                              | 1.12928 | C37H75N2O6P | -0.0368635 | 1.8019           | 0.84956  |
| 413                                              | 1.09471 | C44H84NO8P  | -0.0355022 | 1.8403           | 0.87996  |
| 328                                              | 1.08677 | C41H78NO7P  | -0.0396239 | 1.1825           | 0.24179  |
| 238                                              | 1.08642 | C24H52NO6P  | 0.0101569  | 1.5859           | 0.6653   |
| 203                                              | 1.07666 | C24H38O4    | 0.00048243 | 0.51265          | -0.96394 |
| 453                                              | 1.07611 | C46H87NO13  | -0.043287  | 1.2049           | 0.26888  |
| 315                                              | 1.07537 | C39H77N2O6P | -0.0192131 | 1.7233           | 0.78514  |
| 394                                              | 1.06748 | C44H84NO8P  | 0.0178442  | 0.8164           | -0.29265 |
| 382                                              | 1.0588  | C45H80NO7P  | -0.0564405 | 2.3208           | 1.2146   |
| 258                                              | 1.05142 | C26H52NO7P  | -0.0208985 | 1.7073           | 0.77169  |
| 309                                              | 1.03808 | C38H77N2O6P | -0.0302047 | 1.6262           | 0.70155  |
| 454                                              | 1.01925 | C47H83O13P  | -0.0249137 | 1.5268           | 0.61052  |
| 358                                              | 1.01861 | C42H80NO8P  | -0.0363448 | 13.637           | 3.7695   |
| 244                                              | 1.0127  | C24H50NO7P  | -0.0277706 | 1.8792           | 0.91015  |

**Supplemental Table 7. G1 metabolome compared to that of non-MDS (control group)  
LC-MS analysis in positive ion mode**

| Lipids with VIP score greater than or equal to 1 |          |             |            |                  |          |
|--------------------------------------------------|----------|-------------|------------|------------------|----------|
| ID                                               | VIP      | FORMULA     | COEF       | FOLD CHANGE (FC) | log2(FC) |
| 323                                              | 1.56632  | C43H78NO8P  | 0.151883   | 0.27918          | -1.8408  |
| 408                                              | 1.32335  | C45H85O13P  | -0.0670108 | 7.2012           | 2.8482   |
| 98                                               | 1.32293  | C12H26O4S   | 0.0921068  | 0.80035          | -0.3213  |
| 264                                              | 1.31462  | C39H74NO8P  | 0.00958981 | 0.22411          | -2.1578  |
| 251                                              | 1.31229  | C37H69O8P   | -0.0114198 | 0.10257          | -3.2854  |
| 332                                              | 1.30547  | C42H79O11P  | -0.0131707 | 8.9215           | 3.1573   |
| 282                                              | 1.29458  | C41H80NO7P  | -0.0899385 | 2.9836           | 1.5771   |
| 392                                              | 1.2815   | C46H80NO10P | 0.00796141 | 0.16842          | -2.5699  |
| 374                                              | 1.26622  | C44H76NO10P | -0.0014927 | 0.18398          | -2.4424  |
| 300                                              | 1.24799  | C41H80NO8P  | 0.0870158  | 1.2335           | 0.30274  |
| 393                                              | 1.24487  | C46H82NO10P | 0.01055    | 0.20086          | -2.3157  |
| 137                                              | 1.24462  | C18H30O3S   | 0.0997555  | 1.2662           | 0.34046  |
| 320                                              | 1.20227  | C43H74NO8P  | 0.0283447  | 0.20561          | -2.2821  |
| 258                                              | 1.17415  | C39H74NO7P  | -0.0945788 | 10.907           | 3.4471   |
| 389                                              | 1.16122  | C46H78NO10P | 0.00200301 | 0.23671          | -2.0788  |
| 322                                              | 1.135    | C43H76NO8P  | -0.0078362 | 0.34093          | -1.5525  |
| 138                                              | 1.10424  | C18H30O3S   | -0.110132  | 1.4981           | 0.58318  |
| 266                                              | 1.09911  | C39H76NO8P  | 0.0230982  | 0.45714          | -1.1293  |
| 376                                              | 1.08914  | C44H78NO10P | 0.0137641  | 0.36168          | -1.4672  |
| 196                                              | 1.08141  | C23H46NO7P  | 0.0988699  | 0.67187          | -0.57374 |
| 303                                              | 1.06103  | C43H74NO7P  | -0.0762404 | 6.0124           | 2.5879   |
| 277                                              | 1.04281  | C41H78NO7P  | 0.0622577  | 1.4233           | 0.50928  |
| 287                                              | 1.03826  | C41H74NO8P  | -0.0086705 | 0.43916          | -1.1872  |
| 317                                              | 1.02767  | C40H76NO10P | -0.0110579 | 0.3711           | -1.4301  |
| 407                                              | 1.02361  | C45H83O13P  | -0.0363555 | 1.9803           | 0.98572  |
| 324                                              | 1.01509  | C43H78NO8P  | 0.100518   | 0.6529           | -0.61506 |
| 308                                              | 1.00897  | C43H78NO7P  | -0.0398775 | 0.55399          | -0.85208 |
| 351                                              | 1.00442  | C42H76NO10P | -0.0069644 | 0.30229          | -1.726   |
| 423                                              | 0.997442 | C49H87O13P  | -0.0353915 | 29.927           | 4.9034   |
| 232                                              | 0.996333 | C27H53O12P  | -0.0126688 | 1.6684           | 0.73846  |

**Supplemental Table 8. G1 metabolome compared to that of G2.  
LC-MS analysis in negative ion mode**

| Lipids with VIP score greater than or equal to 1 |         |             |            |                  |          |
|--------------------------------------------------|---------|-------------|------------|------------------|----------|
| ID                                               | VIP     | FORMULA     | COEF       | FOLD CHANGE (FC) | log2(FC) |
| 331                                              | 1.60324 | C41H80NO7P  | -0.114233  | 17.385           | 4.1198   |
| 313                                              | 1.55103 | C39H74NO7P  | -0.145873  | 22.131           | 4.468    |
| 359                                              | 1.48292 | C42H82NO8P  | 0.0781187  | 1.4734           | 0.55917  |
| 325                                              | 1.34942 | C41H74NO7P  | 0.0138829  | 3.5537           | 1.8293   |
| 224                                              | 1.33444 | C28H46O4    | -0.110406  | 1.1908           | 0.25197  |
| 330                                              | 1.31072 | C41H81N2O6P | 0.0285454  | 0.038618         | -4.6946  |
| 453                                              | 1.30377 | C46H87NO13  | 0.00679151 | 3.2327           | 1.6927   |
| 328                                              | 1.28636 | C41H78NO7P  | 0.0192636  | 3.956            | 1.9841   |
| 332                                              | 1.25225 | C41H83N2O6P | 0.00976807 | 0.087405         | -3.5161  |
| 393                                              | 1.22288 | C44H84NO8P  | 0.0692114  | 1.2166           | 0.28289  |
| 403                                              | 1.21341 | C42H80NO10P | -0.0204082 | 3.1076           | 1.6358   |
| 394                                              | 1.19293 | C44H84NO8P  | -0.0496091 | 1656.7           | 10.694   |
| 442                                              | 1.1891  | C44H78NO10P | 0.0243183  | 0.19357          | -2.3691  |
| 317                                              | 1.15809 | C39H79N2O6P | 0.0243478  | 0.27906          | -1.8413  |
| 444                                              | 1.14597 | C46H78NO10P | 0.0183461  | 0.24989          | -2.0007  |
| 426                                              | 1.14081 | C44H78NO10P | 0.0239602  | 0.26222          | -1.9311  |
| 183                                              | 1.13381 | C21H40O4    | -0.0157055 | 26.212           | 4.7122   |
| 348                                              | 1.11261 | C41H80NO8P  | 0.00489484 | 2.3592           | 1.2383   |
| 413                                              | 1.08512 | C44H84NO8P  | 0.02884    | 0.3009           | -1.7326  |
| 353                                              | 1.0751  | C43H78NO7P  | -0.0213307 | 7.2723           | 2.8624   |
| 309                                              | 1.06295 | C38H77N2O6P | 0.0170117  | 0.3463           | -1.5299  |
| 350                                              | 1.05236 | C43H74NO7P  | -0.0216739 | 2.6797           | 1.4221   |
| 424                                              | 1.05118 | C47H91N2O6P | 0.0147571  | 0.27115          | -1.8828  |
| 390                                              | 1.04979 | C44H82NO8P  | -0.0207398 | 25.854           | 4.6923   |
| 261                                              | 1.04788 | C26H54NO7P  | 0.0230413  | 0.21295          | -2.2314  |

**Supplemental Table 9. G1 metabolome compared to that of G2.  
LC-MS analysis in positive ion mode**
